# Supplementary material
Source: bioRxiv or medRxiv preprint supplement (https://medrxiv.org/highwire/filestream/77098/field_highwire_adjunct_files/0/2020.04.06.20055665-1.pdf)

## CLINICAL ASSEMBLY: Novel Venturi wall O<sub>2</sub> device

(Provides 10cm of PEEP(CPAP), with an approx. FiO<sub>2</sub> of 40% with 10LPM wall Oxygen)

### Indications for use

- 1) If CPAP machines are available with no constraints on Oxygen use, they should be first line treatment
- 2) In situations where CPAP machines are unavailable or if the need arises to conserve O<sub>2</sub> usage then this device may be considered.
- 3) In the early phase of COVID-19 treatment to provide easy to use early 10cm of PEEP (CPAP) delivering an FiO<sub>2</sub> of approximately 0.4 (40%) until a decision on escalation/de-escalation can be made

### Instructions

Connect a circuit up as shown below:

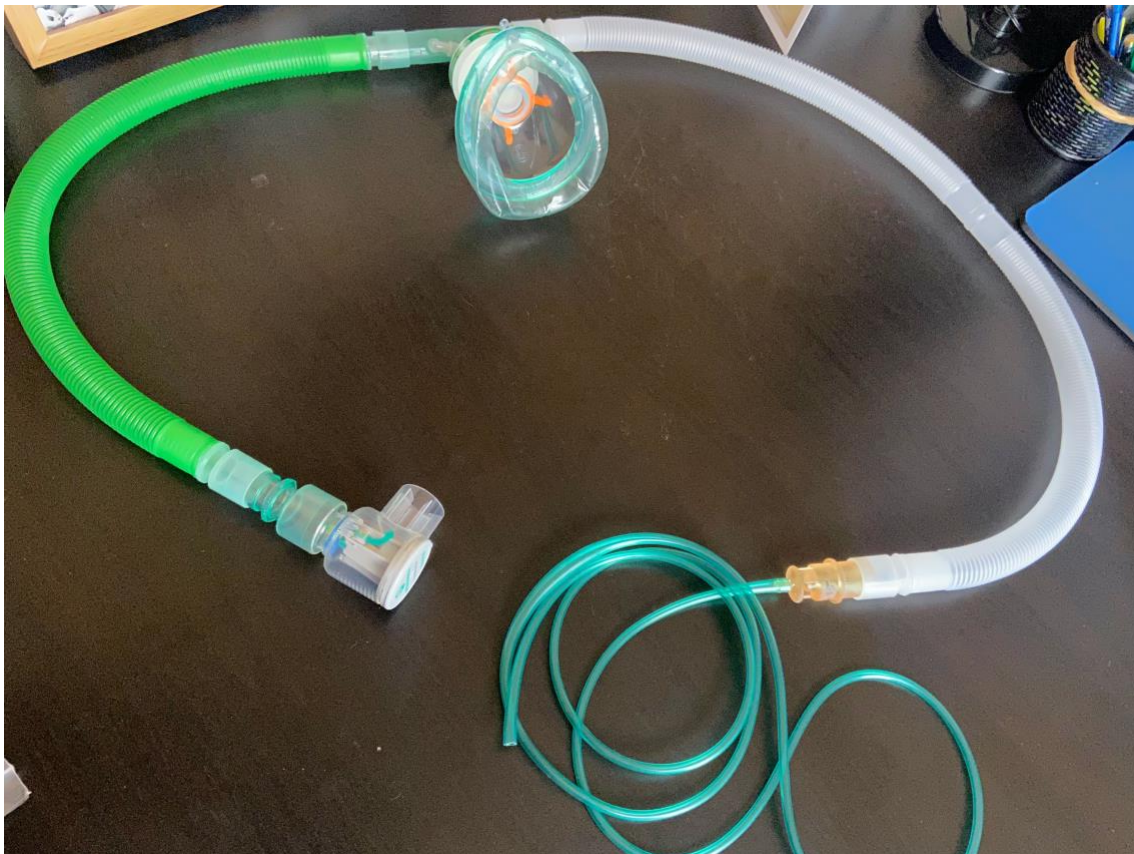

Items for use (1-7):

- 1) Wall oxygen and green tubing at 10LPM

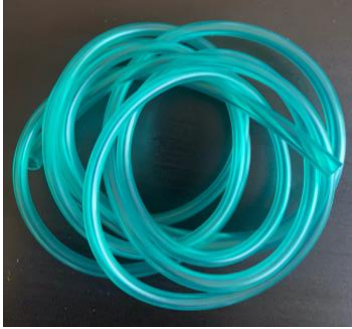

- 2) New Venturi valve

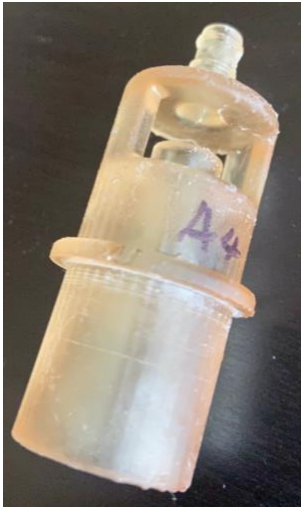

- 3) 22mm input tubing

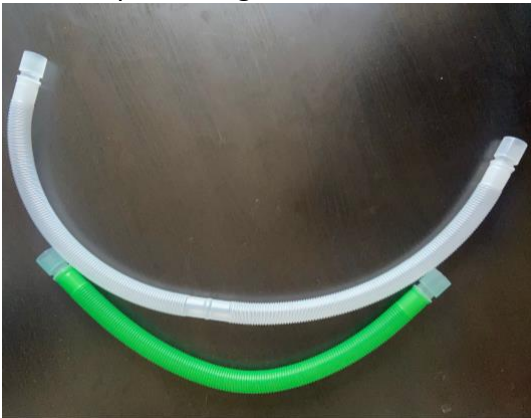

- 4) T piece connector \*may need male to female adapter/ consider T piece with Capnography port

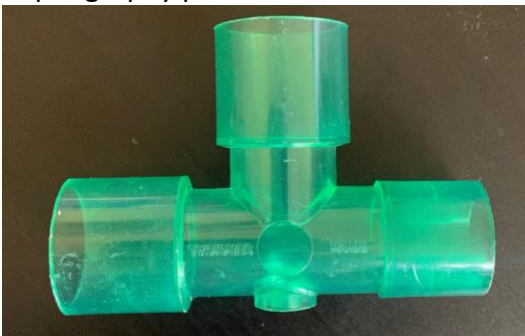

5) CPAP mask with HME viral filter and straps

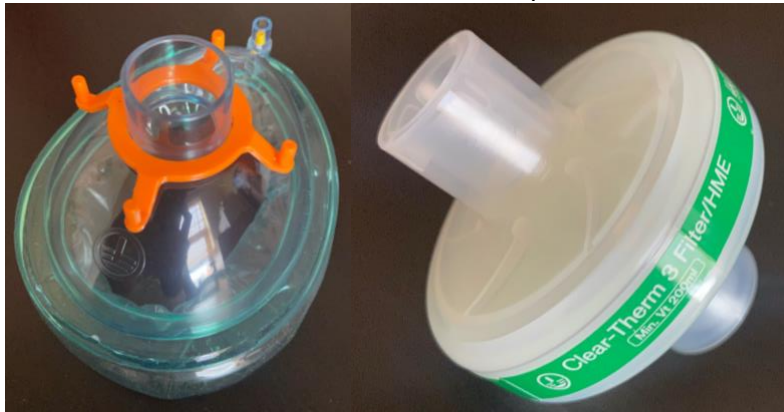

6) 22mm output tubing (see Item number 3)

7) 10cm PEEP valve

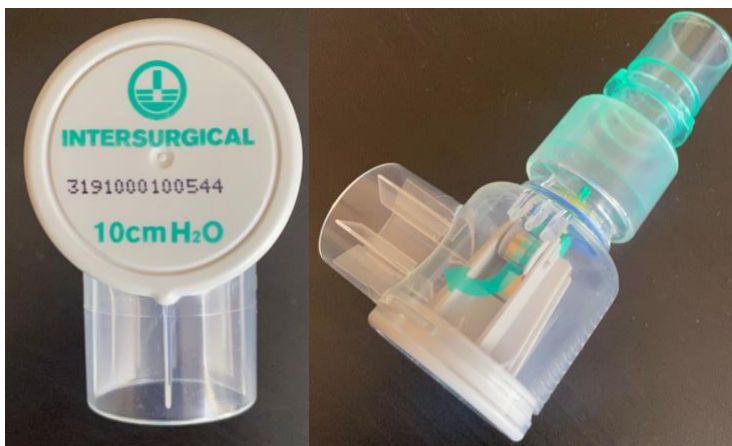

Supplement: Supplementary file [file 2020.04.06.20055665-1.pdf]
